# Supplementary material for: Risk Factors for Persistent Infection of Non-Typhoidal Salmonella in Poultry Farms, North Central Nigeria
Source: MDPI journal article supplement (doi:10.3390/antibiotics11081121), 2022-08-18
Supplement: s1 [file s1]

*Table S1. Categorization of Variables based on selected industry standards and peer reviewed literature.*

| Question                  | Category           | Reference | Reclassification                                                     | Notes                                                                                                                 | Reference                                                                                                                                                                                                                                              |
|---------------------------|--------------------|-----------|----------------------------------------------------------------------|-----------------------------------------------------------------------------------------------------------------------|--------------------------------------------------------------------------------------------------------------------------------------------------------------------------------------------------------------------------------------------------------|
| State                     | State by state     | No        |                                                                      | -                                                                                                                     | -                                                                                                                                                                                                                                                      |
| Serial number             | -                  | No        |                                                                      | -                                                                                                                     | -                                                                                                                                                                                                                                                      |
| L .G. A                   | L. G. A by L. G. A | No        |                                                                      | -                                                                                                                     | -                                                                                                                                                                                                                                                      |
| Gender                    | 0 vs 1             | Y         | M=1<br>F=0                                                           | There 57% of women and 51% of men with a gender gap of 7.2% are involved in poultry.                                  | The World Bank Nigeria development report (2021)<br>( <a href="https://www.worldbank.org/en/country/nigeria/publication/nigeria-development-update-ndu">https://www.worldbank.org/en/country/nigeria/publication/nigeria-development-update-ndu</a> ). |
| Age of respondents        | 0 vs 1             | Y         | 41 and above = 1<br>1-40 = 0                                         | The mean age of poultry farmers is 40 years                                                                           | Gender participation in commercial poultry production<br>( <a href="http://www.lrrd.org/lrrd22/9/okoh22160">http://www.lrrd.org/lrrd22/9/okoh22160</a> )                                                                                               |
| Length in poultry farming | 0 vs 1             | Y         | 6 and above =1<br>1-5 = 0                                            | 65% of farmers have mean farming experience of 6 years                                                                | Differentials in technical efficiency among broiler farmers in Imo state Nigeria ( <a href="https://www.ajol.infor/index.php/naj/article/view/196166/185183">https://www.ajol.infor/index.php/naj/article/view/196166/185183</a> )                     |
| Education level           | 0 vs 1             | Y         | Primary & secondary =0<br>Tertiary & others higher qualifications =1 | 40% of poultry farm owners hold secondary school cert, 35% a university degree and 8.3% a primary school certificate. | Socio-economic factors as determinants of farm management skills<br>( <a href="http://www.resarchgate.net/publication/321650666">www.resarchgate.net/publication/321650666</a> )                                                                       |

|                                |        |   |                                                  |                                                                                                                                                                                       |                                                                                                                                                                                                                      |
|--------------------------------|--------|---|--------------------------------------------------|---------------------------------------------------------------------------------------------------------------------------------------------------------------------------------------|----------------------------------------------------------------------------------------------------------------------------------------------------------------------------------------------------------------------|
| Farm location                  |        |   |                                                  | Skipped, not analyzed                                                                                                                                                                 |                                                                                                                                                                                                                      |
| Name of farm                   |        |   |                                                  | Skipped, not analyzed                                                                                                                                                                 |                                                                                                                                                                                                                      |
| Type of poultry                | 0 vs 1 | Y | Broiler = 0<br>Layer & others = 1                |                                                                                                                                                                                       | Short cycle and long cycle                                                                                                                                                                                           |
| Number of chickens in the farm | 0 vs 1 | Y | 500 and above = 0<br>1-499 = 1                   |                                                                                                                                                                                       | -                                                                                                                                                                                                                    |
| Source of feed                 | 0 vs 1 | Y | Self-compounded = 1<br>Commercial = 0            | Poultry farmers prefer to use self-compounded feeds than commercial feeds                                                                                                             | Poultry farmers preference and use of commercial and self-formulated feeds ( <a href="https://www.researchgate.net/publication/223151006">https://www.researchgate.net/publication/223151006</a> )                   |
| Source of water for birds      | 0 vs 1 | Y | Borehole/tap borne = 0<br>Stream/well/others = 1 | 27% of poultry farmers depend on borehole, tap water combined and 3% on depended solely well, stream or river.                                                                        | quality of different water sources used in poultry and piggery farms in southeastern Nigeria ( <a href="https://www.researchgate.net/publication/349180707">https://www.researchgate.net/publication/349180707</a> ) |
| Pen type                       | 0 vs 1 | Y | Standard block= 0<br>Others = 1                  | In commercial and semi commercial setting in developing countries, chickens are normally housed in naturally ventilated pen with additional lightning provided in form of electricity | Poultry development review ( <a href="https://www.fao.org/3/i3531e/i3531e.pdf">https://www.fao.org/3/i3531e/i3531e.pdf</a> )                                                                                         |

|                          |        |   |                                                   |                                                                                                                               |                                                                                                                                                                                                                                                                                         |
|--------------------------|--------|---|---------------------------------------------------|-------------------------------------------------------------------------------------------------------------------------------|-----------------------------------------------------------------------------------------------------------------------------------------------------------------------------------------------------------------------------------------------------------------------------------------|
| System of management     | 0 vs 1 | Y | Deep litter = 1<br>Battery cage = 0               | There are three primary intensive control: deep litter, battery case and wire floor system.                                   | Types of poultry management systems ( <a href="https://fabioiclass.com/poultry-management-systems/">https://fabioiclass.com/poultry-management-systems/</a> )                                                                                                                           |
| Litter material          | 0 vs 1 | Y | Saw dust/wood shavings/sand =0<br>Cement floor= 1 |                                                                                                                               | Beddings and no beddings                                                                                                                                                                                                                                                                |
| Litter management        | 0 vs 1 | Y | Good=0<br>Poor/fair=1                             | Daily grading of litter should be done.it is advisable to also use dry lime in order to keep litre dry.                       | Poultry litter management for better performance and production ( <a href="https://www.pashudhanpraharee.com/poultry-litter-management-for-better-performance-and-production/">https://www.pashudhanpraharee.com/poultry-litter-management-for-better-performance-and-production/</a> ) |
| Pen odour                | 0 vs 1 | Y | Yes =1<br>No =0                                   | Ammonia is the cause of pen odor and the most environmentally significant aerial pollution associated with poultry production | Poultry development review ( <a href="https://www.fao.org/3/i3531e/i3531e.pdf">https://www.fao.org/3/i3531e/i3531e.pdf</a> )                                                                                                                                                            |
| Stocking density         | 0 vs 1 | Y | 1-16 =0<br>17 & above = 1                         |                                                                                                                               | Code of practice 2012, broiler production South Africa<br><a href="http://www.sapoultry.co.za/pdf-docs/code-practice-broilers.pdf">http://www.sapoultry.co.za/pdf-docs/code-practice-broilers.pdf</a>                                                                                   |
| Adherence to Vaccination | 0 vs 1 | Y | Yes=1<br>No/partial=0                             | 87% of poultry farmers vaccinate their chickens                                                                               | An appraisal of the use of vaccination for disease prevention in poultry in Ibadan, Nigeria. ( <a href="http://www.ajol.info/index.php/bahpa/article/view/76526">www.ajol.info/index.php/bahpa/article/view/76526</a> )                                                                 |

|                                                               |        |   |                                           |                                                                                                     |                                                                                                                                                                                                                                                                                                                                                             |
|---------------------------------------------------------------|--------|---|-------------------------------------------|-----------------------------------------------------------------------------------------------------|-------------------------------------------------------------------------------------------------------------------------------------------------------------------------------------------------------------------------------------------------------------------------------------------------------------------------------------------------------------|
| Practice biosecurity                                          | 0 vs 1 | Y | Yes = 1<br>No/partial = 0                 | Practice of biosecurity in the study area was high                                                  | Adoption of biosecurity for disease prevention and control by poultry farmers in Imo state, Nigeria ( <a href="http://www.ajol.info/index.php/jafs/article/view/204206">www.ajol.info/index.php/jafs/article/view/204206</a> )                                                                                                                              |
| Ever administered fowl typhoid/ cholera vaccine               | 0 vs 1 | Y | Yes = 1<br>No = 0                         | 4% of farmers vaccinate chickens against fowl typhoid and fowl cholera                              | An appraisal of the use of vaccination for disease prevention in poultry in Ibadan, Nigeria. ( <a href="http://www.ajol.info/index.php/bahpa/article/view/76526">www.ajol.info/index.php/bahpa/article/view/76526</a> )                                                                                                                                     |
| Ever heard of Salmonella infection in poultry                 | 0 vs 1 | Y | Yes = 1<br>No = 0                         | -                                                                                                   | -                                                                                                                                                                                                                                                                                                                                                           |
| Ever experienced Salmonellosis                                | 0 vs 1 | Y | Yes=1<br>No=0                             | Large scale farms had experienced more salmonella prevalence at 33% prevalence rate                 | Prevalence of salmonella in chicken , farm attendants and beddings ( <a href="http://www.researchgat.net/figure/prevalence-of-salmonella-in-chickens-farm-attendants-and-bediing-in-hawassa-and-bonga-tbi2_317032593">www.researchgat.net/figure/prevalence-of-salmonella-in-chickens-farm-attendants-and-bediing-in-hawassa-and-bonga-tbi2_317032593</a> ) |
| If salmonella ever encountered how was it managed/controlle d | 0 vs 1 | Y | Antibiotic/Vac cination = 1<br>Others = 0 | -                                                                                                   | Survey                                                                                                                                                                                                                                                                                                                                                      |
| Knowledge of Salmonella as a zoonotic agent                   | 0 vs 1 | Y | No knowledge = 0<br>Knowledge = 1         | Majority of respondent have good knowledge about poultry diseases but not poultry zoonotic diseases | Understanding attitude, practices and knowledge of zoonotic infectious disease risks among poultry farmers in Ghana ( <a href="https://onlinelibrary.wiley.com/doi/10.1002/vms3.257">https://onlinelibrary.wiley.com/doi/10.1002/vms3.257</a> )                                                                                                             |

|                                                           |        |    |                                                         |                                                                                                                |                                                                                                                                                                                                                                                    |
|-----------------------------------------------------------|--------|----|---------------------------------------------------------|----------------------------------------------------------------------------------------------------------------|----------------------------------------------------------------------------------------------------------------------------------------------------------------------------------------------------------------------------------------------------|
| Source of knowledge of Salmonella as major zoonotic agent | 0 vs 1 | Y  | Media = 1<br>Others = 0                                 | Farmers with higher education level and longer experience have improved knowledge of zoonotic poultry diseases | Understanding attitude, practices and knowledge of zoonotic infectious disease risks among poultry farmers in Ghana<br>( <a href="https://onlinelibrary.wiley.com/doi/10.1002/vms3.257">https://onlinelibrary.wiley.com/doi/10.1002/vms3.257</a> ) |
| Ever encounter mortality of chickens                      | 0 vs 1 | Y  | No = 0<br>Yes = 1                                       | A mortality rate of 1.5% or less is normal however zero mortality is the aim.                                  | Mortality in poultry ( <a href="https://agreenerworld.org/wp-content/uploads/2018/05/TAFS-8-Mortality-in-poultry-v3.pdf">https://agreenerworld.org/wp-content/uploads/2018/05/TAFS-8-Mortality-in-poultry-v3.pdf</a> )                             |
| Type of mortality                                         | 0 vs 1 | Y  | High & moderate = 1<br>Low/normal = 0                   |                                                                                                                | Survey                                                                                                                                                                                                                                             |
| Ever taken sample to a veterinarian/ animal health lab.   | 0 vs 1 | Y  | No = 0<br>Yes = 1                                       | -                                                                                                              | -                                                                                                                                                                                                                                                  |
| Type of Sample                                            | -      | No |                                                         |                                                                                                                | Survey                                                                                                                                                                                                                                             |
| What was the result?                                      | 0 vs 1 | Y  | Salmonella / Salmonella + others=1<br>No Salmonella = 0 | -                                                                                                              | -                                                                                                                                                                                                                                                  |
| What did you do after the result?                         | 0 vs 1 | Y  | Sell = 1<br>Others = 0                                  | -                                                                                                              | Survey                                                                                                                                                                                                                                             |
| What is the cost of treatment?                            | 0 vs 1 | Y  | High = 1<br>Others = 1                                  | -                                                                                                              | Survey                                                                                                                                                                                                                                             |

|                                             |        |    |                      |                                                           |                                                                                                                                         |
|---------------------------------------------|--------|----|----------------------|-----------------------------------------------------------|-----------------------------------------------------------------------------------------------------------------------------------------|
| Estimated cost of mortality from salmonella | 0 vs 1 | Y  | High= 1<br>Others= 0 | -                                                         | Survey                                                                                                                                  |
| Did Salmonella affect your production?      | -      | No |                      | -                                                         | Survey                                                                                                                                  |
| Nature of effect on production              | -      | No |                      | -                                                         | Survey                                                                                                                                  |
| Profit after sales                          | -      | No |                      | -                                                         | Survey                                                                                                                                  |
| Access to professional support              | 0 vs 1 | Y  | Yes= 1<br>Others= 0  | Shortage of professional affects availability of support. | Challenges and prospect of poultry industry ( <a href="https://www.grin.com/document/296347">https://www.grin.com/document/296347</a> ) |

LGA = Local Government Authority; Y = Yes.

*Supplementary Material File S1. Sample Questionnaire for risk factor data collection in the field*

1. State -
2. Serial Number -
3. LGA -
4. Gender - A. Male, B. Female
5. Age of respondents – A. >60, B. 41-60, C. 21-40, D.<20
6. Length in Poultry Farming - <2years, B. 2-4years, C. 4-6years, D. >6years
7. Educational level – A. primary B. Secondary C. Tertiary D. others
8. Farm location -
9. Name of farm -
10. Type of poultry (commercial or backyard) – A. broilers B. Layers C. mixed D. others
11. Number of chickens in the farm – A. <200 B. 201-500 C. 501-1000 D. >1000
12. Source of feed- A. commercial feed B. concentrate mix C. self-compounded
13. Source of water for birds – A. borehole B. tap borne C. Well D. Stream E. others  
(describe)
14. Pen type – A. standard block B. dwarf block C. zinc type D. others
15. System of management – A. deep litter B. battery cage C. others
16. Litter material – A. Sawdust B. wood shavings C. Sand D. cement floor E. others
17. Litter management – A. Good B. Poor C. Fair
18. Pen odor – A. Yes B. No
19. Stocking density – A. 12-14/M<sup>2</sup> B. 14-16/M<sup>2</sup> C. 16-18/M<sup>2</sup> D. 18-20/M<sup>2</sup> E. >20/M<sup>2</sup> F. not known
20. Adherence to vaccination - A. Yes B. No C. Partial
21. Practice biosecurity - A. Yes B. No C. Partial
22. Ever administered fowl typhoid/ cholera vaccine - A. Yes B. No
23. Ever heard of salmonella infections in poultry - A. Yes B. No
24. Ever experienced salmonella infection on farm - A. Yes B. No C. Don't Know

25. If salmonella ever encountered how was it managed/controlled – A. antibiotics B. Vaccination C. antibiotics and vaccination D. culling and sale E. others
26. Knowledge of salmonella as a zoonotic agent - A. Yes B. No
27. Source of knowledge of Salmonella as a zoonotic agent A. electronic media B. print media C. extension agent D. vet/animal health officer E. other farmers F. hospital
28. Ever encountered mortality of chickens - A. Yes B. No
29. Type of mortality A. high B. Moderate C. Low D. normal occurrence
30. Ever taken samples to a veterinarian/animal health lab - A. Yes B. No
31. What type of samples – A. feces B. Egg C. whole bird D. all E. others
32. What was the result – A. salmonella B. salmonella and another infection C. other
33. What did you do after the result? A. Treat B. Sell C. others
34. What is the cost of treatment – A. high B. Moderate C. Low D. others
35. Estimated cost of mortality from salmonella – A. high B. Moderate C. Low D. others
36. Did salmonella affect your production - A. Yes B. No
37. Nature of effect on production: A. high B. Moderate C. Low D. others
38. Profit after sales - A. Yes B. No
39. Access to professional support - A. Yes B. No C. Not always D. others
